# Supplementary material
Source: PubMed Central journal article supplement (PMC4764142)

SUPPLEMENTARY DATA

**Supplementary Figure 1.** Representative CD68-IHC staining showing total macrophage infiltration in the subcutaneous adipose tissue from a high VAT/VAT+SAT obese adolescents (A) and a low VAT/VAT+SAT obese adolescent (B).

**Macrophage counting**

Immunohistochemistry (IHC): CD68 staining

A

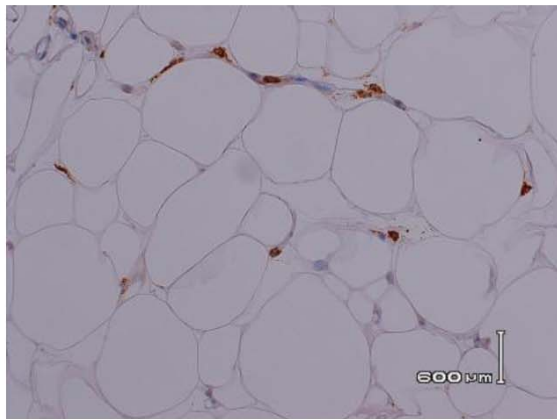

Insulin Resistant  
Age: 16  
BMI: 38  
M (clamp): 2 mg/Kg\*min

B

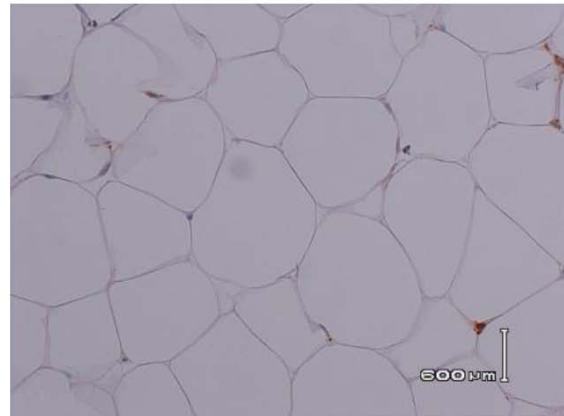

Inulin Sensitive  
Age: 16  
BMI: 38  
M (clamp): 9 mg/Kg\*min

**Supplementary Figure 2.** Representative CD68-IHC staining showing Crown Like Structures.

**Crown Like Structures**

Immunohistochemistry (IHC): CD68 staining

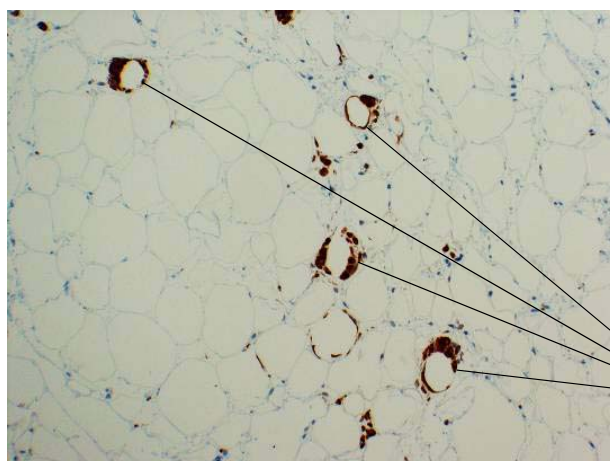

CLS  
"crown like structures"

SUPPLEMENTARY DATA

**Supplementary Figure 3.** Ratio plasma over tissue ceramides between low (white bars) and high (black bars) group (mean  $\pm$  SD, n=21). \* indicate that the t-test between the 2 groups was significant at the  $<0.05$  level.

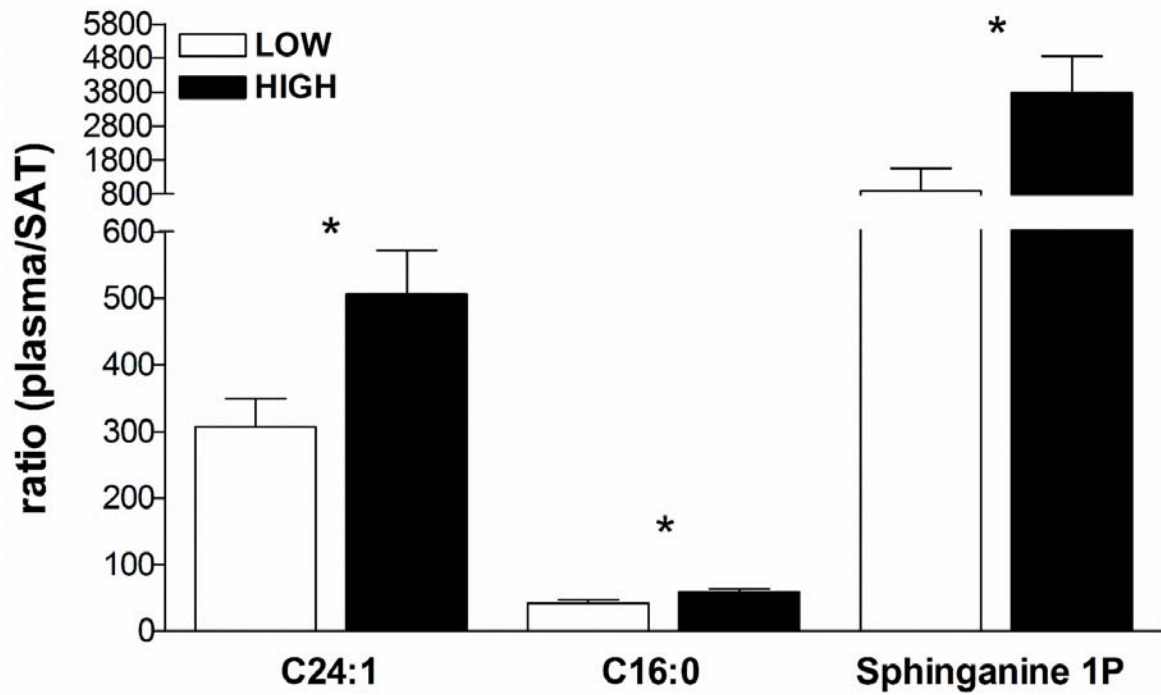

Supplement: supp_db15-1478_DB151478SupplementaryData.pdf [file supp_db15-1478_DB151478SupplementaryData.pdf]
